# Supplementary material for: A modified two-step sequential deposition method for preparing perovskite CH3NH3PbI3 solar cells
Source: Royal Society of Chemistry journal article supplement (doi:10.1039/c6ra05718g), 2016-01-01
Supplement: c6ra05718g1.pdf [file c6ra05718g1.pdf]

## Supporting Information

### **A modified two-step sequential deposition method for preparing perovskite CH<sub>3</sub>NH<sub>3</sub>PbI<sub>3</sub> solar cells**

*Feng Shao,<sup>a,b</sup> Li Xu,<sup>c</sup> Yian Xie,<sup>b</sup> Zhangliu Tian,<sup>b</sup> Yaoming Wang,<sup>b</sup> Peng Sheng,<sup>c</sup>*

*Deliang Wang,<sup>a</sup> and Fuqiang Huang<sup>\*,b,d</sup>*

<sup>a</sup> Hefei National Laboratory for Physical Sciences at the Microscale, University of Science and Technology of China, Hefei 230026, P. R. China

<sup>b</sup> CAS Key Laboratory of Materials for Energy Conversion, Shanghai Institute of Ceramics, Chinese Academy of Sciences, Shanghai 200050, P. R. China

<sup>c</sup> State Key laboratory of Advanced Transmission Technology, State Grid Smart Grid Research Institute

<sup>d</sup> State Key Laboratory of Rare Earth Materials Chemistry and Applications, College of Chemistry and Molecular Engineering, Peking University, Beijing 100871, P. R. China

\* Corresponding Authors E-mail: [huangfq@mail.sic.ac.cn](mailto:huangfq@mail.sic.ac.cn).

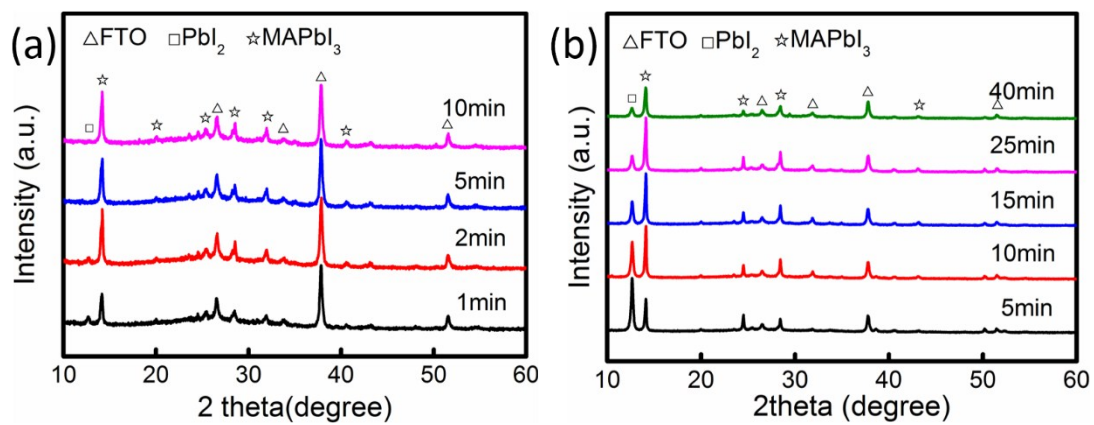

**Figure S1** XRD patterns of (a) SSE-PbI<sub>2</sub> films and (b) SC-PbI<sub>2</sub> films with different immersing time in MAI 2-propanol solution.

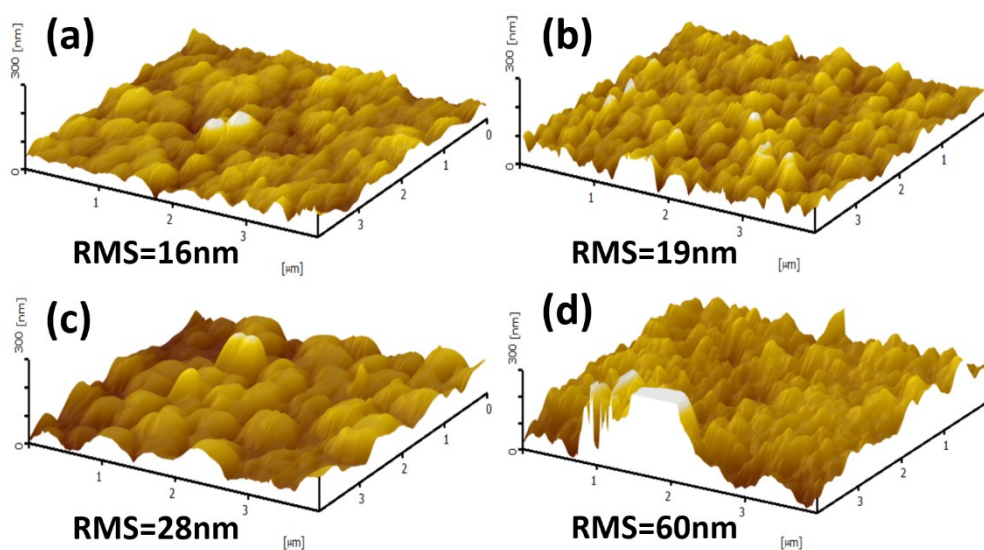

**Figure S2** AFM images of (a) SC-SS-MAPI film, (b) SSE-SS-MAPI film, (c) SC-immersed-MAPI film, and (d) SSE-immersed-MAPI film.

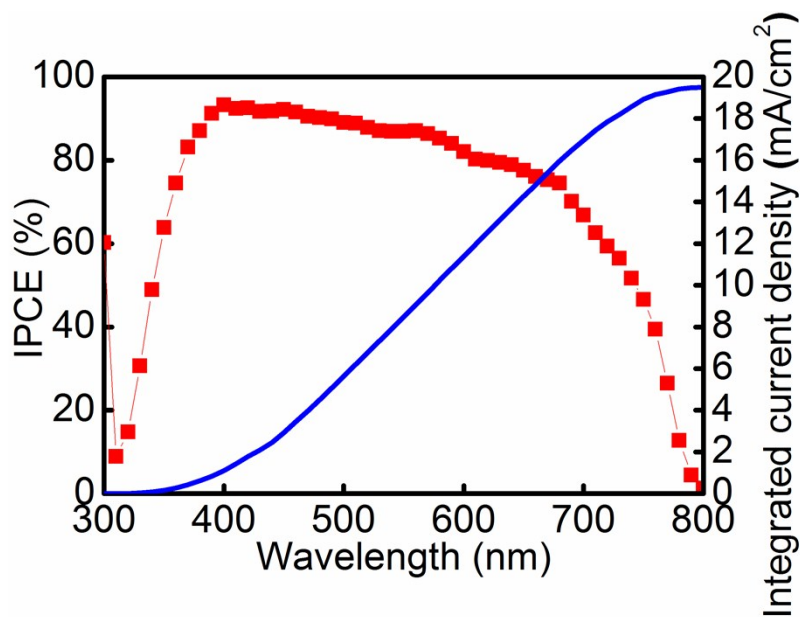

**Figure S3** The EQE spectrum (red) and the integrated photocurrent density (blue) of the best performed device fabricated with the SSE-SS-MAPI film expected to be generated under AM 1.5G irradiation.

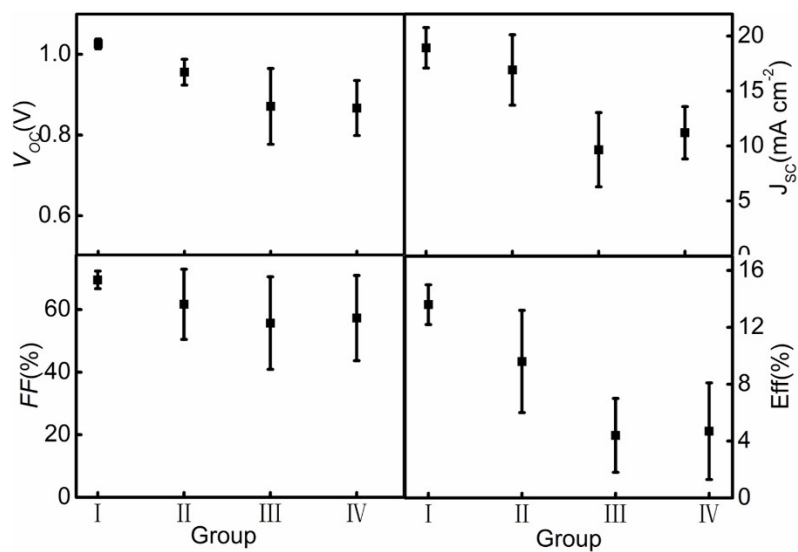

**Figure S4** Statistical average device parameters extracted from J-V curves as a function of four groups of devices prepared with four different kinds of MAPI films.

Group I : SSE-SS-MAPI; Group II : SC-immersed-MAPI; Group III: SSE-immersed-MAPI; Group IV: SC-SS-MAPI.

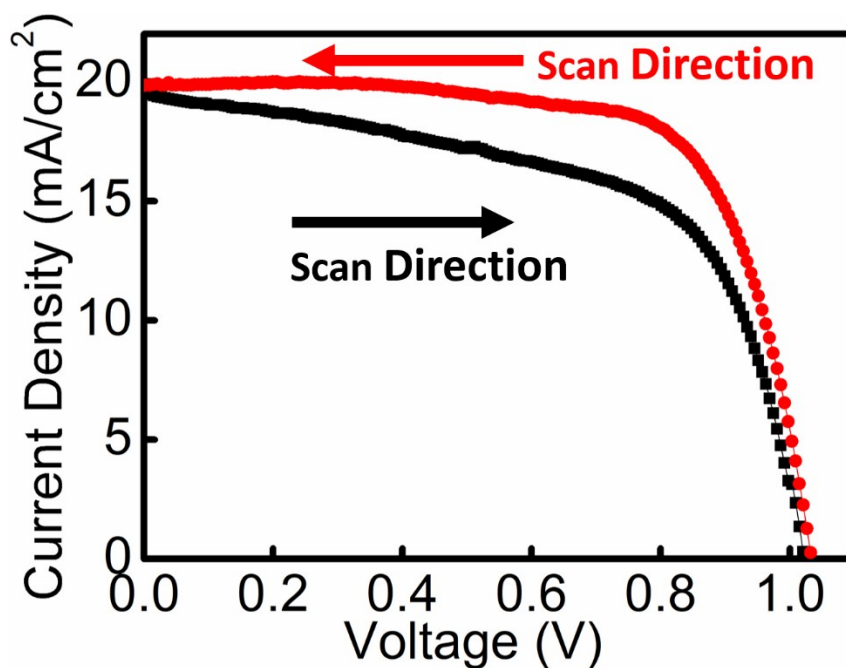

**Figure S5** J-V curves of the best performed device fabricated with the SSE-SS-MAPI film with different scan rate.

**Table S1** Summary of performance parameters of the best performed device fabricated with the SSE-SS-MAPI film with different scan direction at scan rate of 57.5 mV s<sup>-1</sup>.

| Scan direction | $V_{oc}$ (V) | $J_{sc}$ (mA cm <sup>-2</sup> ) | $FF$ (%) | $\eta$ (%) |
|----------------|--------------|---------------------------------|----------|------------|
| Backward       | 1.032        | 19.85                           | 69.9     | 14.3       |
| Forward        | 1.023        | 19.55                           | 59.3     | 11.9       |
